# Supplementary material
Source: PubMed Central journal article supplement (PMC5744203)
Supplement: JCM.01243-17_zjm999095787s1.pdf [file JCM.01243-17_zjm999095787s1.pdf]

Davenport, K., B. Mosher, B. Brost, D. Henderson, N. Denkers, A. Nalls, E. McNulty, C. Mathiason, and E. Hoover. Distinguishing the shedding and detection of CWD prions in deer saliva with occupancy modeling.

Appendix A. Multi-scale false positive occupancy model specification and associated full-conditional distributions.

## 1 MODEL STATEMENT

Let  $y_{ijk}$  be a binary observation representing a detection/non-detection, where  $i = 1, \dots, N$  indexes individual deer,  $j = 1, \dots, J_i$  indexes saliva samples nested within deer, and  $k = 1, \dots, K_{ij}$  indexes replicates per saliva sample. Also let  $v_c$  be the number of detections out of  $M_c$  trials obtained in the “negative control” dataset for detection method  $c$  (i.e., concentration methods PTA and IOME).

$$\begin{aligned}
 y_{ijk} &\sim \begin{cases} (1 - \phi_c) \text{Bern}(p_{ijk}) + \phi_c 1_{\{y_{ijk}=1\}}, & a_{ij} = 1 \\ \text{Bern}(\phi_c), & a_{ij} = 0 \end{cases} \\
 a_{ij} &\sim \begin{cases} \text{Bern}(\theta_{ij}), & z_i = 1 \\ 0, & z_i = 0 \end{cases} \\
 z_i &\sim \text{Bern}(\psi_i) \\
 \psi_i &= \text{logit}^{-1}(\mathbf{x}'_i \boldsymbol{\beta}) \\
 \theta_{ij} &= \text{logit}^{-1}(\mathbf{u}'_{ij} \boldsymbol{\gamma}) \\
 p_{ijk} &= \text{logit}^{-1}(\mathbf{w}'_{ijk} \boldsymbol{\alpha}) \\
 \boldsymbol{\beta} &\sim \mathcal{N}(\boldsymbol{\mu}_\beta, \sigma_\beta^2 \mathbf{I}) \\
 \boldsymbol{\gamma} &\sim \mathcal{N}(\boldsymbol{\mu}_\gamma, \sigma_\gamma^2 \mathbf{I}) \\
 \boldsymbol{\alpha} &\sim \mathcal{N}(\boldsymbol{\mu}_\alpha, \sigma_\alpha^2 \mathbf{I}) \\
 v_c &\sim \text{Binom}(M_c, \phi_c) \\
 \phi_c &\sim \text{Beta}(a, b)
 \end{aligned}$$

The parameters are as follows:

|                           |                                                                                                                                                     |
|---------------------------|-----------------------------------------------------------------------------------------------------------------------------------------------------|
| $\phi_c$                  | Probability of a false positive error for detection method $c$ .                                                                                    |
| $p_{ijk}$                 | Probability of detection for replicate $k$ obtained from saliva sample $j$ within deer $i$ .                                                        |
| $a_{ij}$                  | Latent use state.                                                                                                                                   |
| $\theta_{ij}$             | Probability of use for saliva sample $j$ within deer $i$ .                                                                                          |
| $z_i$                     | Latent occupancy state. Note that we set $z_i = 1$ given the experimental design of the chronic wasting disease applications.                       |
| $\psi_i$                  | Probability of occupancy for deer $i$ (not estimated given the known occupancy state).                                                              |
| $\boldsymbol{\beta}$      | Vector of coefficients that describe the affect of covariates $\mathbf{x}_i$ on probability of use (not estimated given the known occupancy state). |
| $\boldsymbol{\gamma}$     | Vector of coefficients that describe the affect of covariates $\mathbf{u}_{ij}$ on probability of use.                                              |
| $\boldsymbol{\alpha}$     | Vector of coefficients that describe the affect of covariates $\mathbf{w}_{ijk}$ on probability of detection.                                       |
| $\boldsymbol{\mu}_\beta$  | Prior mean for occupancy coefficients.                                                                                                              |
| $\boldsymbol{\mu}_\gamma$ | Prior mean for use coefficients.                                                                                                                    |
| $\boldsymbol{\mu}_\alpha$ | Prior mean for detection coefficients.                                                                                                              |

|                 |                                                       |
|-----------------|-------------------------------------------------------|
| $\sigma_\beta$  | Prior standard deviation for occupancy coefficients.  |
| $\sigma_\gamma$ | Prior standard deviation for use coefficients.        |
| $\sigma_\alpha$ | Prior standard deviation for detection coefficients.  |
| $a, b$          | Prior shape parameters for false positive error rate. |

## 2 FULL-CONDITIONAL DISTRIBUTIONS

### 2.1 Occupancy state ( $z_i$ )

$$\begin{aligned}
[z_i \mid \cdot] &\propto \prod_{j=1}^{J_i} [a_{ij} \mid \theta_{ij}, z_i] [z_i] \\
&\propto \prod_{j=1}^{J_i} \left( \theta_{ij}^{a_{ij}} (1 - \theta_{ij})^{1-a_{ij}} \right)^{z_i} \left( 1_{\{a_{ij}=0\}}^{1-z_i} \right) \psi_i^{z_i} (1 - \psi_i)^{1-z_i} \\
&\propto \prod_{j=1}^{J_i} \left( \psi_i \theta_{ij}^{a_{ij}} (1 - \theta_{ij})^{1-a_{ij}} \right)^{z_i} \left( (1 - \psi_i) 1_{\{a_{ij}=0\}} \right)^{1-z_i} \\
&= \text{Bern}(\tilde{\psi}_i),
\end{aligned}$$

where,

$$\tilde{\psi}_i = \frac{\psi_i \prod_{j=1}^{J_i} \theta_{ij}^{a_{ij}} (1 - \theta_{ij})^{1-a_{ij}}}{\psi_i \prod_{j=1}^{J_i} \theta_{ij}^{a_{ij}} (1 - \theta_{ij})^{1-a_{ij}} + (1 - \psi_i) \prod_{j=1}^{J_i} 1_{\{a_{ij}=0\}}}.$$

### 2.2 Use state ( $a_{ij}$ )

Note that the mixture specification for  $a_{ij}$  in the model statement above is equivalent to  $a_{ij} \sim \text{Bern}(z_i \theta_{ij})$ , an alternate specification that simplifies the update for  $a_{ij}$ .

$$\begin{aligned}
[a_{ij} \mid \cdot] &\propto \prod_{k=1}^{K_{ij}} [y_{ijk} \mid p_{ijk}, a_{ij}, \phi_c] [a_{ij}] \\
&\propto \prod_{k=1}^{K_{ij}} \left( (1 - \phi_c) p_{ijk}^{y_{ijk}} (1 - p_{ijk})^{1-y_{ijk}} + \phi_c 1_{\{y_{ijk}=1\}} \right)^{a_{ij}} \left( \phi_c^{y_{ijk}} (1 - \phi_c)^{1-y_{ijk}} \right)^{1-a_{ij}} (z_i \theta_{ij})^{a_{ij}} (1 - z_i \theta_{ij})^{1-a_{ij}} \\
&\propto \prod_{k=1}^{K_{ij}} \left[ (z_i \theta_{ij}) \left( (1 - \phi_c) p_{ijk}^{y_{ijk}} (1 - p_{ijk})^{1-y_{ijk}} + \phi_c 1_{\{y_{ijk}=1\}} \right) \right]^{a_{ij}} \left( (1 - z_i \theta_{ij}) \phi_c^{y_{ijk}} (1 - \phi_c)^{1-y_{ijk}} \right)^{1-a_{ij}} \\
&= \text{Bern}(\tilde{\theta}_{ij}),
\end{aligned}$$

where,

$$\tilde{\theta}_{ij} = \frac{z_i \theta_{ij} \prod_{k=1}^{K_{ij}} \left[ (1 - \phi_c) p_{ijk}^{y_{ijk}} (1 - p_{ijk})^{1-y_{ijk}} + \phi_c 1_{\{y_{ijk}=1\}} \right]}{z_i \theta_{ij} \prod_{k=1}^{K_{ij}} \left[ (1 - \phi_c) p_{ijk}^{y_{ijk}} (1 - p_{ijk})^{1-y_{ijk}} + \phi_c 1_{\{y_{ijk}=1\}} \right] + (1 - z_i \theta_{ij}) \prod_{k=1}^{K_{ij}} \phi_c^{y_{ijk}} (1 - \phi_c)^{1-y_{ijk}}}.$$

### 2.3 Occupancy coefficients ( $\beta$ )

$$\begin{aligned}
[\beta \mid \cdot] &\propto \prod_{i=1}^N [z_i \mid \psi_i] [\beta] \\
&\propto \prod_{i=1}^N \text{Bern}(z_i \mid \psi_i) \mathcal{N}(\beta \mid \mu_\beta, \sigma_\beta^2 \mathbf{I}).
\end{aligned}$$

The update for  $\beta$  proceeds using Metropolis-Hastings.

#### 2.4 Use coefficients ( $\gamma$ )

$$\begin{aligned} [\gamma | \cdot] &\propto \prod_{i=1}^N \prod_{j=1}^{J_i} [a_{ij} | \theta_{ij}, z_i] [\gamma] \\ &\propto \prod_{i=1}^N \prod_{j=1}^{J_i} \text{Bern}(a_{ij} | \theta_{ij})^{z_i} \mathcal{N}(\gamma | \boldsymbol{\mu}_\gamma, \sigma_\gamma^2 \mathbf{I}). \end{aligned}$$

The update for  $\gamma$  proceeds using Metropolis-Hastings. Note that the product over  $i$  only includes instances of  $i$  such that  $z_i = 1$ .

#### 2.5 Detection coefficients ( $\alpha$ )

$$\begin{aligned} [\alpha | \cdot] &\propto \prod_{i=1}^N \prod_{j=1}^{J_i} \prod_{k=1}^{K_{ij}} [y_{ijk} | p_{ijk}, a_{ij}, \phi_c] [\alpha] \\ &\propto \prod_{i=1}^N \prod_{j=1}^{J_i} \prod_{k=1}^{K_{ij}} \left[ (1 - \phi_c) p_{ijk}^{y_{ijk}} (1 - p_{ijk})^{1 - y_{ijk}} + \phi_c 1_{\{y_{ijk}=1\}} \right]^{a_{ij}} \mathcal{N}(\alpha | \boldsymbol{\mu}_\alpha, \sigma_\alpha^2 \mathbf{I}). \end{aligned}$$

The update for  $\alpha$  proceeds using Metropolis-Hastings. Note that the product over  $i$  and  $j$  only includes instances of  $i$  and  $j$  such that  $a_{ij} = 1$ .

#### 2.6 Probability of a false positive detection ( $\phi_c$ )

$$\begin{aligned} [\phi_c | \cdot] &\propto [v_c | M_c, \phi_c] [\phi_c] \\ &\propto \text{Binom}(v_c | M_c, \phi_c) \text{Beta}(a, b) \\ &\propto \phi_c^v (1 - \phi_c)^{M_c - v_c} \phi_c^{a-1} (1 - \phi_c)^{b-1} \\ &\propto \phi_c^{v_c + a - 1} (1 - \phi_c)^{M_c - v_c + b - 1} \\ &= \text{Beta}(v_c + a, M_c - v_c + b) \end{aligned}$$
