# Supplementary material
Source: PubMed Central journal article supplement (PMC5744203)
Supplement: JCM.01243-17_zjm999095787s2.pdf [file JCM.01243-17_zjm999095787s2.pdf]

**Supplemental Table 1. Deer level covariates.** All covariates tested for each deer (n=45) are shown. IOME = iron-oxide magnetic extraction, PTA = phosphotungstic acid precipitation, PO = per os/oral, IP = intraperitoneal, IC = intracranial, IV = intravenous. Genotype refers to the amino acids at codon 96 (G = glycine, S = serine).

| Deer | Genotype | Sex    | Technique | Route   | Inoculum |
|------|----------|--------|-----------|---------|----------|
| 107  | GG       | Female | IOME      | PO      | Saliva   |
| 108  | GG       | Female | IOME      | IP      | Blood    |
| 113  | GG       | Female | IOME      | PO      | Saliva   |
| 121  | GS       | Male   | IOME      | IC      | Brain    |
| 122  | GG       | Male   | IOME      | PO      | Saliva   |
| 132  | GG       | Male   | IOME      | PO      | Saliva   |
| 137  | GS       | Female | IOME      | IV      | Blood    |
| 144  | GG       | Female | IOME      | PO      | Saliva   |
| 147  | GG       | Male   | IOME      | PO      | Saliva   |
| 303  | GS       | Female | IOME      | IV      | Blood    |
| 322  | GG       | Female | IOME      | IV      | Blood    |
| 324  | GG       | Female | IOME      | IV      | Blood    |
| 325  | GG       | Female | IOME      | IV      | Blood    |
| 346  | GG       | Male   | IOME      | IV      | Blood    |
| 347  | GS       | Female | IOME      | IV      | Blood    |
| 357  | GS       | Female | IOME      | IV      | Blood    |
| 372  | GG       | Female | IOME      | IV      | Blood    |
| 4116 | GG       | Male   | IOME      | IV      | Blood    |
| 4128 | GG       | Male   | IOME      | IV      | Blood    |
| 4461 | GG       | Male   | IOME      | Contact | Contact  |
| 4506 | GG       | Male   | IOME      | IV      | Blood    |
| 4512 | GG       | Male   | IOME      | IV      | Blood    |
| 6332 | GG       | Male   | IOME      | Contact | Contact  |
| 6333 | GG       | Male   | IOME      | IP      | Blood    |
| 6335 | GG       | Male   | IOME      | IP      | Blood    |
| 6338 | GG       | Male   | IOME      | Contact | Contact  |
| 6364 | GG       | Female | IOME      | IP      | Blood    |
| 6372 | GS       | Female | IOME      | Contact | Contact  |
| 773  | GS       | Male   | PTA       | PO      | Brain    |
| 775  | GS       | Male   | PTA       | PO      | Brain    |
| 776  | GG       | Male   | PTA       | PO      | Brain    |
| 777  | GS       | Male   | PTA       | PO      | Brain    |
| 778  | GG       | Female | PTA       | PO      | Brain    |
| 781  | GG       | Female | PTA       | PO      | Brain    |
| 782  | GG       | Male   | PTA       | PO      | Brain    |
| 783  | GS       | Female | PTA       | PO      | Brain    |
| 784  | GG       | Male   | PTA       | PO      | Brain    |
| 785  | GG       | Female | PTA       | PO      | Brain    |
| 786  | GG       | Female | PTA       | PO      | Brain    |
| 812  | GG       | Male   | PTA       | Aerosol | Brain    |
| 813  | GG       | Female | PTA       | Aerosol | Brain    |
| 815  | GG       | Male   | PTA       | Aerosol | Brain    |
| 816  | GG       | Female | PTA       | Aerosol | Brain    |
| 817  | GG       | Male   | PTA       | Aerosol | Brain    |
| 818  | GG       | Female | PTA       | Aerosol | Brain    |
