# Supplementary material
Source: PubMed Central journal article supplement (PMC5744203)
Supplement: JCM.01243-17_zjm999095787s3.pdf [file JCM.01243-17_zjm999095787s3.pdf]

**Supplemental Table 2. Sample level covariates.** All covariates for each saliva sample are listed. For tonsil biopsy positive, the sample was assigned “1” if the deer had a positive tonsil biopsy on or before the collection of the saliva sample.

| Deer | MPI | Tonsil biopsy positive | Storage duration (years) | % Replicates Positive |
|------|-----|------------------------|--------------------------|-----------------------|
| 107  | 12  | 0                      | 12.32                    | 57%                   |
| 107  | 16  | 0                      | 11.99                    | 57%                   |
| 108  | 6   | 0                      | 12.77                    | 0%                    |
| 108  | 12  | 1                      | 12.27                    | 0%                    |
| 108  | 16  | 1                      | 11.93                    | 75%                   |
| 113  | 12  | 1                      | 12.30                    | 71%                   |
| 113  | 16  | 0                      | 11.97                    | 86%                   |
| 121  | 6   | 1                      | 12.88                    | 50%                   |
| 121  | 12  | 1                      | 12.39                    | 88%                   |
| 121  | 25  | 1                      | 11.32                    | 13%                   |
| 122  | 12  | 1                      | 12.26                    | 86%                   |
| 122  | 16  | 1                      | 11.93                    | 57%                   |
| 132  | 3   | 0                      | 11.86                    | 14%                   |
| 132  | 6   | 0                      | 11.61                    | 86%                   |
| 132  | 12  | 0                      | 11.12                    | 57%                   |
| 132  | 15  | 0                      | 10.87                    | 86%                   |
| 132  | 16  | 0                      | 10.79                    | 71%                   |
| 137  | 3   | 0                      | 12.21                    | 0%                    |
| 137  | 15  | 0                      | 11.22                    | 0%                    |
| 137  | 16  | 1                      | 11.14                    | 0%                    |
| 144  | 6   | 0                      | 11.61                    | 29%                   |
| 144  | 12  | 1                      | 11.12                    | 43%                   |
| 144  | 26  | 1                      | 9.97                     | 86%                   |
| 147  | 3   | 0                      | 11.86                    | 43%                   |
| 147  | 6   | 0                      | 11.61                    | 71%                   |
| 147  | 12  | 0                      | 11.12                    | 57%                   |
| 147  | 16  | 0                      | 10.79                    | 75%                   |
| 303  | 3   | 0                      | 10.21                    | 0%                    |
| 303  | 6   | 0                      | 9.96                     | 0%                    |
| 303  | 12  | 1                      | 9.47                     | 0%                    |
| 303  | 19  | 1                      | 8.89                     | 0%                    |
| 322  | 3   | 0                      | 10.21                    | 13%                   |
| 322  | 6   | 0                      | 9.96                     | 0%                    |
| 322  | 12  | 0                      | 9.47                     | 0%                    |
| 322  | 15  | 0                      | 9.22                     | 0%                    |
| 322  | 19  | 1                      | 8.89                     | 0%                    |
| 324  | 3   | 0                      | 10.21                    | 0%                    |
| 324  | 6   | 0                      | 9.97                     | 0%                    |
| 324  | 12  | 0                      | 9.47                     | 0%                    |
| 324  | 15  | 0                      | 9.23                     | 0%                    |
| 324  | 19  | 1                      | 8.90                     | 0%                    |
| 325  | 3   | 0                      | 10.21                    | 13%                   |
| 325  | 6   | 0                      | 9.96                     | 0%                    |
| 325  | 12  | 1                      | 9.47                     | 0%                    |
| 325  | 19  | 1                      | 8.90                     | 38%                   |
| 346  | 3   | 0                      | 10.21                    | 0%                    |
| 346  | 6   | 0                      | 9.96                     | 0%                    |
| 346  | 12  | 1                      | 9.47                     | 13%                   |
| 346  | 19  | 1                      | 8.90                     | 0%                    |
| 347  | 3   | 0                      | 10.18                    | 0%                    |

|      |    |   |       |     |
|------|----|---|-------|-----|
| 347  | 6  | 1 | 9.93  | 13% |
| 347  | 12 | 1 | 9.44  | 0%  |
| 347  | 15 | 1 | 9.19  | 0%  |
| 347  | 19 | 1 | 8.87  | 0%  |
| 357  | 3  | 0 | 10.21 | 25% |
| 357  | 6  | 0 | 9.97  | 0%  |
| 357  | 12 | 0 | 9.47  | 0%  |
| 357  | 15 | 0 | 9.23  | 0%  |
| 357  | 19 | 1 | 8.90  | 13% |
| 372  | 6  | 0 | 9.93  | 0%  |
| 372  | 12 | 1 | 9.44  | 38% |
| 372  | 15 | 1 | 9.19  | 0%  |
| 4116 | 3  | 0 | 11.31 | 0%  |
| 4116 | 6  | 0 | 11.07 | 38% |
| 4116 | 26 | 1 | 9.42  | 50% |
| 4128 | 3  | 0 | 11.31 | 0%  |
| 4128 | 6  | 0 | 11.07 | 0%  |
| 4128 | 12 | 1 | 10.57 | 25% |
| 4128 | 15 | 1 | 10.33 | 0%  |
| 4128 | 20 | 1 | 9.92  | 25% |
| 4461 | 3  | 0 | 11.35 | 0%  |
| 4461 | 15 | 1 | 10.36 | 75% |
| 4461 | 20 | 1 | 9.95  | 63% |
| 4506 | 6  | 1 | 11.13 | 0%  |
| 4506 | 12 | 1 | 10.64 | 75% |
| 4506 | 21 | 1 | 9.90  | 25% |
| 4512 | 3  | 0 | 11.33 | 13% |
| 4512 | 6  | 0 | 11.08 | 0%  |
| 4512 | 12 | 0 | 10.59 | 0%  |
| 4512 | 15 | 1 | 10.35 | 0%  |
| 4512 | 20 | 1 | 9.93  | 0%  |
| 6332 | 6  | 0 | 7.74  | 0%  |
| 6332 | 10 | 0 | 7.41  | 0%  |
| 6332 | 15 | 1 | 7.00  | 13% |
| 6333 | 6  | 0 | 7.84  | 0%  |
| 6333 | 12 | 1 | 7.35  | 0%  |
| 6333 | 16 | 1 | 7.02  | 0%  |
| 6335 | 12 | 1 | 7.35  | 0%  |
| 6335 | 16 | 1 | 7.02  | 0%  |
| 6338 | 6  | 0 | 7.74  | 13% |
| 6338 | 10 | 0 | 7.41  | 0%  |
| 6338 | 15 | 0 | 7.00  | 0%  |
| 6364 | 6  | 0 | 7.84  | 0%  |
| 6364 | 12 | 1 | 7.35  | 25% |
| 6364 | 16 | 1 | 7.02  | 0%  |
| 6372 | 6  | 0 | 7.74  | 0%  |
| 6372 | 10 | 0 | 7.41  | 0%  |
| 6372 | 15 | 1 | 7.00  | 0%  |
| 773  | 3  | 0 | 2.80  | 0%  |
| 773  | 6  | 1 | 2.55  | 0%  |
| 773  | 10 | 1 | 2.22  | 0%  |
| 773  | 12 | 1 | 2.06  | 0%  |
| 775  | 3  | 0 | 2.80  | 0%  |
| 775  | 6  | 0 | 2.55  | 0%  |

|     |    |   |      |     |
|-----|----|---|------|-----|
| 775 | 9  | 1 | 2.30 | 0%  |
| 775 | 10 | 1 | 2.22 | 0%  |
| 775 | 12 | 1 | 2.06 | 0%  |
| 776 | 3  | 0 | 2.80 | 0%  |
| 776 | 9  | 1 | 2.30 | 13% |
| 776 | 10 | 1 | 2.22 | 0%  |
| 776 | 12 | 1 | 2.06 | 50% |
| 777 | 3  | 0 | 2.80 | 0%  |
| 777 | 6  | 1 | 2.55 | 0%  |
| 777 | 10 | 1 | 2.22 | 38% |
| 777 | 12 | 1 | 2.06 | 25% |
| 778 | 3  | 0 | 2.80 | 0%  |
| 778 | 6  | 1 | 2.55 | 0%  |
| 778 | 9  | 1 | 2.30 | 0%  |
| 778 | 12 | 1 | 2.06 | 0%  |
| 781 | 3  | 0 | 2.80 | 0%  |
| 781 | 6  | 0 | 2.55 | 50% |
| 781 | 9  | 0 | 2.30 | 0%  |
| 781 | 10 | 0 | 2.22 | 0%  |
| 781 | 12 | 0 | 2.06 | 0%  |
| 782 | 3  | 0 | 2.80 | 0%  |
| 782 | 6  | 1 | 2.55 | 0%  |
| 782 | 9  | 1 | 2.30 | 88% |
| 782 | 12 | 1 | 2.06 | 0%  |
| 783 | 3  | 0 | 2.80 | 0%  |
| 783 | 6  | 1 | 2.55 | 0%  |
| 783 | 9  | 1 | 2.30 | 25% |
| 783 | 10 | 1 | 2.22 | 38% |
| 783 | 12 | 1 | 2.06 | 0%  |
| 784 | 3  | 0 | 2.80 | 0%  |
| 784 | 6  | 1 | 2.55 | 0%  |
| 784 | 9  | 1 | 2.30 | 88% |
| 784 | 10 | 1 | 2.22 | 50% |
| 784 | 12 | 1 | 2.06 | 50% |
| 785 | 3  | 0 | 2.80 | 0%  |
| 785 | 6  | 1 | 2.55 | 0%  |
| 785 | 9  | 1 | 2.30 | 0%  |
| 785 | 12 | 1 | 2.06 | 0%  |
| 786 | 3  | 0 | 2.80 | 0%  |
| 786 | 6  | 1 | 2.55 | 0%  |
| 786 | 9  | 1 | 2.30 | 38% |
| 786 | 12 | 1 | 2.06 | 25% |
| 812 | 6  | 1 | 2.33 | 0%  |
| 812 | 12 | 1 | 1.83 | 0%  |
| 812 | 15 | 1 | 1.59 | 0%  |
| 812 | 16 | 1 | 1.50 | 0%  |
| 812 | 19 | 1 | 1.26 | 0%  |
| 812 | 20 | 1 | 1.18 | 0%  |
| 812 | 21 | 1 | 1.09 | 0%  |
| 812 | 23 | 1 | 0.93 | 0%  |
| 812 | 25 | 1 | 0.76 | 0%  |
| 812 | 26 | 1 | 0.68 | 88% |
| 813 | 6  | 1 | 2.33 | 13% |
| 813 | 9  | 1 | 2.08 | 88% |

|     |       |   |      |     |
|-----|-------|---|------|-----|
| 813 | 12    | 1 | 1.83 | 88% |
| 813 | 15    | 1 | 1.59 | 88% |
| 813 | 16    | 1 | 1.50 | 38% |
| 813 | 19    | 1 | 1.26 | 38% |
| 813 | 20    | 1 | 1.18 | 88% |
| 813 | 21    | 1 | 1.09 | 25% |
| 813 | 22    | 1 | 1.01 | 0%  |
| 813 | 23    | 1 | 0.93 | 0%  |
| 813 | 23.5  | 1 | 0.89 | 0%  |
| 815 | 6     | 1 | 2.33 | 0%  |
| 815 | 12    | 1 | 1.83 | 0%  |
| 815 | 15    | 1 | 1.59 | 38% |
| 815 | 16    | 1 | 1.50 | 25% |
| 815 | 19    | 1 | 1.26 | 88% |
| 815 | 21    | 1 | 1.09 | 50% |
| 815 | 22    | 1 | 1.01 | 0%  |
| 815 | 23    | 1 | 0.93 | 0%  |
| 815 | 23.5  | 1 | 0.89 | 0%  |
| 815 | 23.75 | 1 | 0.87 | 0%  |
| 816 | 9     | 1 | 2.08 | 13% |
| 816 | 16    | 1 | 1.50 | 0%  |
| 816 | 19    | 1 | 1.26 | 0%  |
| 816 | 20    | 1 | 1.18 | 88% |
| 816 | 21    | 1 | 1.09 | 38% |
| 816 | 22    | 1 | 1.01 | 13% |
| 816 | 23    | 1 | 0.93 | 50% |
| 816 | 23.5  | 1 | 0.89 | 25% |
| 816 | 25    | 1 | 0.76 | 25% |
| 817 | 3     | 0 | 2.57 | 75% |
| 817 | 6     | 1 | 2.33 | 38% |
| 817 | 12    | 1 | 1.83 | 13% |
| 817 | 15    | 1 | 1.59 | 0%  |
| 817 | 16    | 1 | 1.50 | 50% |
| 817 | 20    | 1 | 1.17 | 0%  |
| 817 | 21    | 1 | 1.08 | 75% |
| 818 | 3     | 1 | 2.57 | 0%  |
| 818 | 9     | 1 | 2.08 | 0%  |
| 818 | 12    | 1 | 1.83 | 0%  |
| 818 | 15    | 1 | 1.59 | 63% |
| 818 | 16    | 1 | 1.50 | 63% |
