# Supplementary material
Source: PubMed Central journal article supplement (PMC5744203)
Supplement: JCM.01243-17_zjm999095787s4.pdf [file JCM.01243-17_zjm999095787s4.pdf]

Davenport, K., B. Mosher, B. Brost, D. Henderson, N. Denkers, A. Nalls, E. McNulty, C. Mathiason, and E. Hoover. Distinguishing the shedding and detection of CWD prions in deer saliva with occupancy modeling.

Supplement. Source code for implementing the MCMC algorithm used to estimate parameters in the multi-scale false positive occupancy model.

## 1 FILE LIST

`occ.multiscale.fp.sim.R`  
`occ.multiscale.fp.mcmc.R`

## 2 DESCRIPTION

`occ.multiscale.fp.sim.R` contains R code for loading necessary packages, subroutines, and the MCMC algorithm for model fitting (`occ.multiscale.fp.mcmc.R`); simulating multi-scale occupancy data that contains false negative and false positive errors; fitting the multi-scale false positive occupancy model; and examining the associated model output.

`occ.multiscale.fp.mcmc.R` contains R code to implement the MCMC algorithm for model fitting as outlined in Appendix A.
