# Supplementary material
Source: PubMed Central journal article supplement (PMC5744203)
Supplement: JCM.01243-17_zjm999095787s5.pdf [file JCM.01243-17_zjm999095787s5.pdf]

```
occ.multiscale.fp.mcmc <- function(y,ctrl,groups,W,U,X,priors,start,tune,n.mcmc,adapt=TRUE){
```

```
###
```

```
### Libraries and subroutines
```

```
###
```

```
expit <- function(logit){  
  exp(logit)/(1+exp(logit))  
}
```

```
logit <- function(expit){  
  log(expit/(1-expit))  
}
```

```
get.tune <- function(tune,keep,k,target=0.44){ # adaptive tuning  
  a <- min(0.01,1/sqrt(k))  
  # a <- min(0.025,1/sqrt(k))  
  exp(ifelse(keep<target,log(tune)-a,log(tune)+a))  
}
```

```
y.lik <- function(y,p,phi,log=FALSE){  
  tmp <- (1-phi)*(p^y)*((1-p)^(1-y))+(phi*y)  
  if(log) tmp <- log(tmp)  
  tmp  
}
```

```
###
```

```
### Create variables
```

```
###
```

```

# browser()

N <- nrow(X) # number of sample units

J <- tapply(groups$U[,2],groups$U[,1],function(x) length(x)) # number of subunits per sample
unit

J.sum <- sum(J) # total number of subunits in data set

y.inv <- ifelse(y==1,0,1)

qX <- ncol(X)

qU <- ncol(U)

qW <- ncol(W)

# Create indicator variable that maps latent 'occupancy' state (z) to 'use' state (a)
z.map <- match(groups$U$unit,groups$X$unit)

# Create indicator variable that maps latent 'use' state (a) to observations (y)
a.map <-
match(paste(groups$W$unit,groups$W$subunit),paste(groups$U$unit,groups$U$subunit))

###

### Starting values

###

z <- c(start$z) # latent occupancy state

beta <- as.vector(start$beta) # coefficients for psi (occupancy probability)

gamma <- as.vector(start$gamma) # coefficients for theta (probability of use)

alpha <- as.vector(start$alpha) # coefficients for p (probability of detection)

psi <- expit(X%%beta) # occupancy probability

theta <- expit(U%%gamma) # probability of use

p <- expit(W%%alpha) # detection probability

```

```

###

### Priors

###

mu.beta <- matrix(priors$mu.beta,qX,1) # prior mean for beta (coefficients for psi)
mu.gamma <- matrix(priors$mu.gamma,qU,1) # prior mean for gamma (coefficients for theta)
mu.alpha <- matrix(priors$mu.alpha,qW,1) # prior mean for alpha (coefficients for p)
sigma.beta <- priors$sigma.beta # prior standard deviation for beta (coefficients for psi)
sigma.gamma <- priors$sigma.gamma # prior standard deviation for gamma (coefficients for
theta)
sigma.alpha <- priors$sigma.alpha # prior standard deviation for alpha (coefficients for p)

###

### Create receptacles for output

###

beta.save <- matrix(0,n.mcmc,qX)
gamma.save <- matrix(0,n.mcmc,qU)
alpha.save <- matrix(0,n.mcmc,qW)
z.mean <- numeric(N)
a.mean <- z.map*0
phi.save <- numeric(n.mcmc)

keep <- list(beta=0,gamma=0,alpha=0) # number of MH proposals accepted
keep.tmp <- keep # for adaptive tuning
Tb <- 50 # frequency of adaptive tuning

```

```

###
### Begin MCMC loop
###

for(k in 1:n.mcmc){
  if(k%%1000==0) cat(k, " "); flush.console()

  ###
  ### Adaptive tuning
  ###

  if(adapt==TRUE & k%%Tb==0) { # Adaptive tuning
    keep.tmp <- lapply(keep.tmp,function(x) x/Tb)
    tune$beta <- get.tune(tune$beta,keep.tmp$beta,k)
    tune$gamma <- get.tune(tune$gamma,keep.tmp$gamma,k)
    tune$alpha <- get.tune(tune$alpha,keep.tmp$alpha,k)
    keep.tmp <- lapply(keep.tmp,function(x) x*0)
  }

  ###
  ### Sample a
  ###

# browser()

z.tmp <- z[z.map]
p1 <- z.tmp*theta*c(tapply(y.lik(y,p,phi),a.map,prod))
p0 <- (1-z.tmp*theta)*c(tapply((phi^y)*((1-phi)^(1-y)),a.map,prod))
# boxplot(p0~(tapply(y,a.map,sum)>0))
theta.tmp <- p1/(p1+p0)
# boxplot(theta.tmp~(tapply(y,a.map,sum)>0))

```

```

a <- rbinom(J.sum,1,theta.tmp)

###
### Sample z
###

# browser()

a.inv <- ifelse(a==1,0,1)
p1 <- psi*c(tapply((theta^a)*((1-theta)^(1-a)),z.map,prod))
p0 <- (1-psi)*c(tapply(a.inv,z.map,prod))
# boxplot(p0~(tapply(a,z.map,sum)>0))
psi.tmp <- p1/(p1+p0)
# boxplot(psi.tmp~(tapply(a,z.map,sum)>0))
z <- rbinom(N,1,psi.tmp)

###
### Sample beta (psi)
###

beta.star <- rnorm(qX,beta,tune$beta)
psi.star <- expit(X%*%beta.star)
mh.star <- sum(dbinom(z,1,psi.star,log=TRUE))+
  sum(dnorm(beta.star,mu.beta,sigma.beta,log=TRUE))
mh.0 <- sum(dbinom(z,1,psi,log=TRUE))+
  sum(dnorm(beta,mu.beta,sigma.beta,log=TRUE))
if(exp(mh.star-mh.0) > runif(1)){
  beta <- beta.star
  psi <- psi.star
  keep$beta <- keep$beta+1
}

```

```
        keep.tmp$beta <- keep.tmp$beta+1
    }
```

```
###
```

```
### Sample gamma (theta)
```

```
###
```

```
idx <- which(z[z.map]==1) # Update depends only on subunits within occupied units
```

```
gamma.star <- rnorm(qU,gamma,tune$gamma)
```

```
theta.star <- expit(U%%gamma.star)
```

```
mh.star <- sum(dbinom(a[idx],1,theta.star[idx],log=TRUE))+
```

```
        sum(dnorm(gamma.star,mu.gamma,sigma.gamma,log=TRUE))
```

```
mh.0 <- sum(dbinom(a[idx],1,theta[idx],log=TRUE))+
```

```
        sum(dnorm(gamma,mu.gamma,sigma.gamma,log=TRUE))
```

```
if(exp(mh.star-mh.0) > runif(1)){
```

```
    gamma <- gamma.star
```

```
    theta <- theta.star
```

```
    keep$gamma <- keep$gamma+1
```

```
    keep.tmp$gamma <- keep.tmp$gamma+1
```

```
}
```

```
###
```

```
### Sample alpha (p)
```

```
###
```

```
# browser()
```

```
idx <- which(a[a.map]==1)
```

```
alpha.star <- rnorm(qW,alpha,tune$alpha)
```

```
p.star <- expit(W%%alpha.star)
```

```

mh.star <- sum(y.lik(y[idx],p.star[idx],phi,log=TRUE))+
            sum(dnorm(alpha.star,mu.alpha,sigma.alpha,log=TRUE))
mh.0 <- sum(y.lik(y[idx],p[idx],phi,log=TRUE))+
            sum(dnorm(alpha,mu.alpha,sigma.alpha,log=TRUE))
if(exp(mh.star-mh.0) > runif(1)){
  alpha <- alpha.star
  p <- p.star
  keep$alpha <- keep$alpha+1
  keep.tmp$alpha <- keep.tmp$alpha+1
}

###
### Sample phi (probability of a false positive)
###

# browser()

phi <- rbeta(1,ctrl$ν+priors$a,ctrl$M-ctrl$ν+priors$b)

###
### Save samples
###

beta.save[k,] <- beta
gamma.save[k,] <- gamma
alpha.save[k,] <- alpha
phi.save[k] <- phi
a.mean <- a.mean+a
z.mean <- z.mean+z
}

```

```
cat("\n")

###
### Write output
###

z.mean <- z.mean/n.mcmc
a.mean <- a.mean/n.mcmc

keep <- lapply(keep,function(x) x/n.mcmc)
end <- list(beta=beta,gamma=gamma,alpha=alpha,z=z,a=a,phi=phi) # ending values

list(beta=beta.save,gamma=gamma.save,alpha=alpha.save,a.mean=a.mean,z.mean=z.mean,phi
=phi.save,

keep=keep,end=end,y=y,X=X,U=U,W=W,priors=priors,start=start,tune=tune,n.mcmc=n.mcmc)
}
```
